# Supplementary material for: Generalized DNA Barcode Design Based on Hamming Codes
Source: PLoS One. 2012 May 17;7(5):e36852. doi: 10.1371/journal.pone.0036852 (PMC3355179; doi:10.1371/journal.pone.0036852)
Supplement: File S4 — Poisson calculator. It illustrates performance of different linear codes. (XLS) [file pone.0036852.s004.xls]

## Sheet: Sheet2
Average error rate	Error free tags	Single error tags	double error tags	Hamady	Bystrykh	2-errors correcting
0.1	0.904837	0.0904837	0.00452419	0.96516	0.995321	0.999845
0.2	0.818731	0.163746	0.0163746	0.927895	0.982477	0.998852
0.3	0.740818	0.222245	0.0333368	0.888982	0.963064	0.996401
0.4	0.67032	0.268128	0.0536256	0.849072	0.938448	0.992074
0.5	0.606531	0.303265	0.0758163	0.808708	0.909796	0.985612
0.6	0.548812	0.329287	0.0987861	0.768336	0.878099	0.976885
0.7	0.496585	0.34761	0.121663	0.728325	0.844195	0.965858
0.8	0.449329	0.359463	0.143785	0.688971	0.808792	0.952577
0.9	0.40657	0.365913	0.164661	0.650511	0.772482	0.937143
1	0.367879	0.367879	0.18394	0.613132	0.735759	0.919699
1.1	0.332871	0.366158	0.201387	0.576977	0.699029	0.900416
1.2	0.301194	0.361433	0.21686	0.54215	0.662627	0.879487
1.3	0.272532	0.354291	0.230289	0.508726	0.626823	0.857112
1.4	0.246597	0.345236	0.241665	0.476754	0.591833	0.833498
1.5	0.22313	0.334695	0.251021	0.44626	0.557825	0.808847
1.6	0.201897	0.323034	0.258428	0.417253	0.524931	0.783358
1.7	0.182684	0.310562	0.263978	0.389725	0.493246	0.757223
1.8	0.165299	0.297538	0.267784	0.363658	0.462837	0.730621
1.9	0.149569	0.28418	0.269971	0.339022	0.433749	0.70372
2	0.135335	0.270671	0.270671	0.315782	0.406006	0.676676
2.1	0.122456	0.257158	0.270016	0.293895	0.379615	0.649631
2.2	0.110803	0.243767	0.268144	0.273314	0.35457	0.622714
	2-bits mutations table.
	1/3 of all mutations are 2-bit errors
	from	to	error size
	00	01	1
		10	1
		11	2
	01	00	1
		10	2
		11	1
	10	00	1
		01	2
		11	1
	11	00	2
		01	1
		10	1
